# Supplementary material for: Identification of the Additional Mitochondrial Liabilities of 2-Hydroxyflutamide When Compared With its Parent Compound, Flutamide in HepG2 Cells
Source: PubMed Central journal article supplement (PMC5036617; doi:10.1093/toxsci/kfw126), 2016-07-13
Supplement: supp_kfw126_toxsci-16-0110-File011.pdf [file supp_kfw126_toxsci-16-0110-File011.pdf]

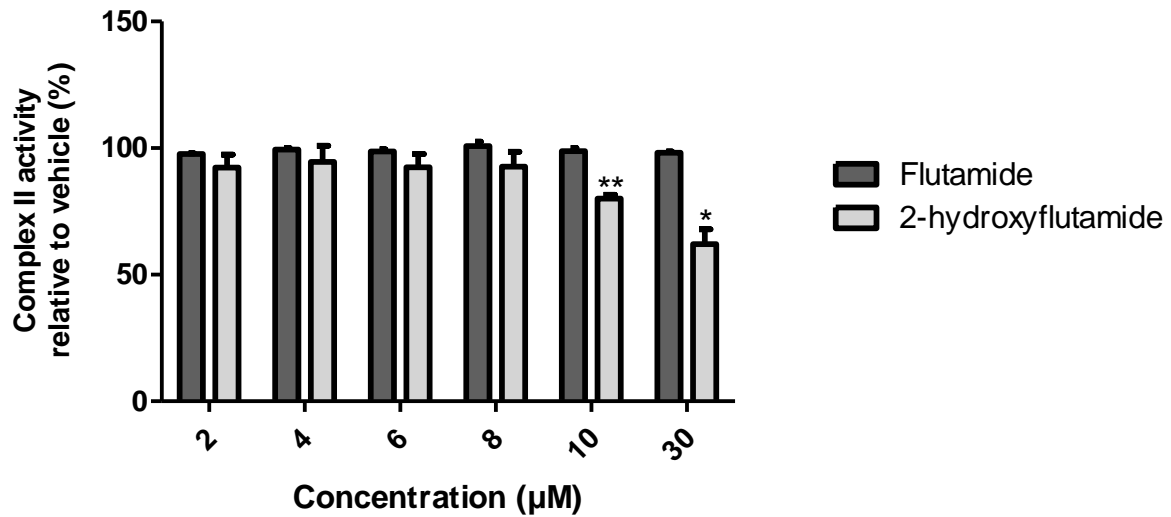

**Supplementary Figure 1** The effect of flutamide and 2-hydroxyflutamide exposure on the activity of mitochondrial respiratory complex II in permeabilised HepG2 cells. Compounds were used at 2-30 μM to include the  $C_{max}$  of 2-hydroxyflutamide (4.4 μM). Statistical significance compared to vehicle control; \* $P < 0.05$ ; \*\* $P < 0.01$ ; \*\*\* $P < 0.001$ . Complex II activity was defined as complex II-stimulated maximal respiration compared to vehicle control. All results were normalised to μg protein per well. Data are presented as mean + SEM of  $n=3$  experiments.

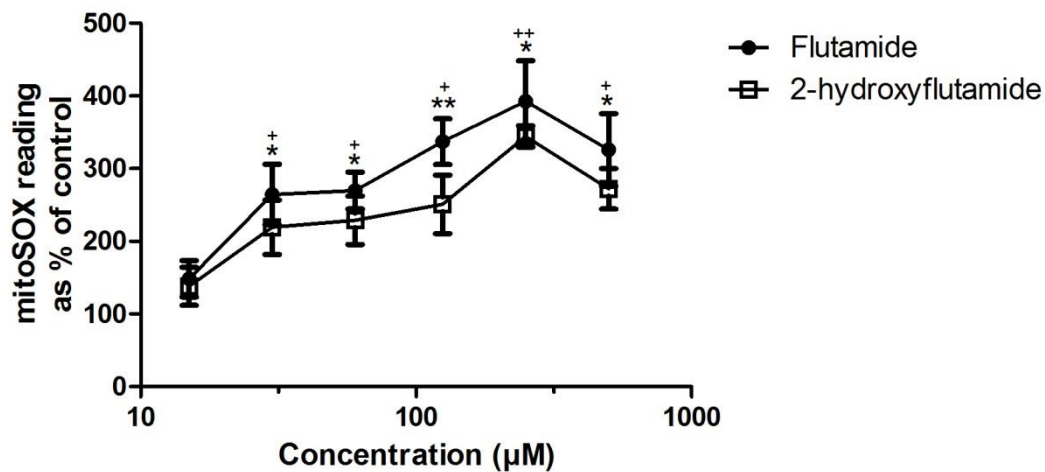

**Supplementary Figure 2** The effect of flutamide and 2-hydroxyflutamide exposure on superoxide levels in acutely galactose-conditioned HepG2 cells (2h). Serial concentrations of compounds were used up to 500 μM. Statistical significance compared to vehicle control; flutamide; \* $P < 0.05$ ; \*\* $P < 0.01$ ; \*\*\* $P < 0.001$ , 2-hydroxyflutamide; + $P < 0.05$ ; ++ $P < 0.01$ ; +++ $P < 0.001$ . All results were normalised to μg protein per well. Data are presented as mean ± SEM of  $n=3$  experiments.

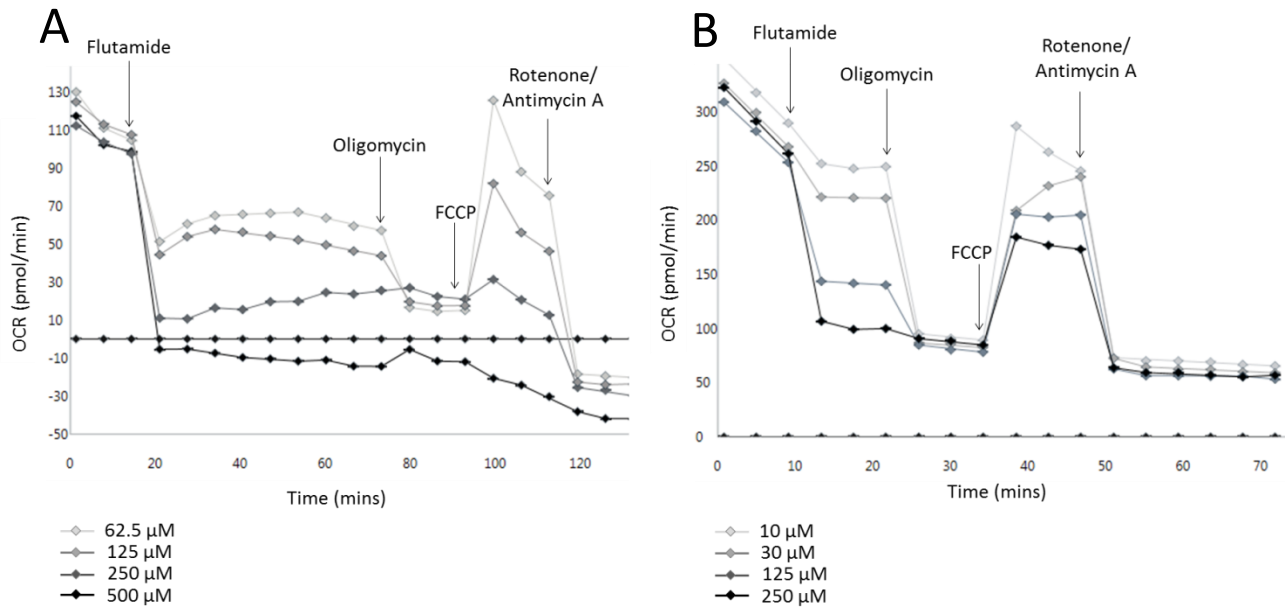

**Supplementary Figure 3** Representative mitochondrial stress test (A) and complex I assay (B) in flutamide-treated HepG2 cells. Concentrations up to 500  $\mu$ M (A) or 250  $\mu$ M (B) of flutamide were used. Mitochondrial stress tests were performed as described in Figure 2. Complex I assays were performed in permeabilised cells in a solution containing substrates required for complex I stimulation, prior to flutamide injection and a mitochondrial stress test. In both assays, upon injection of flutamide there was an immediate concentration-dependent reduction in OCR, supporting the mitochondrial toxicity of flutamide prior to any significant metabolism to 2-hydroxyflutamide.
